# Supplementary material
Source: PubMed Central journal article supplement (PMC2736089)

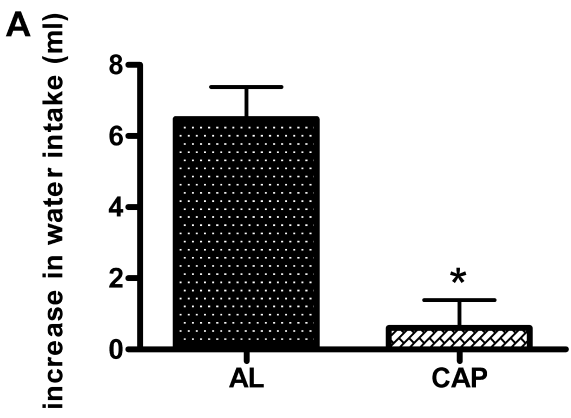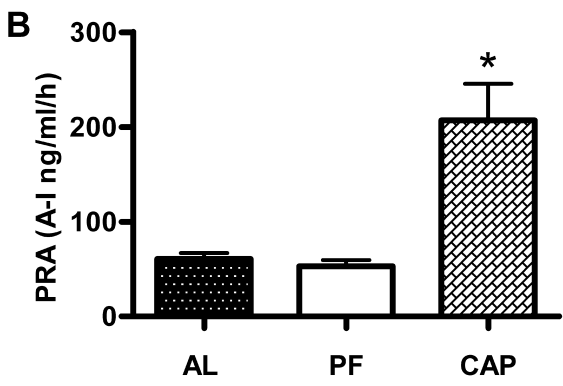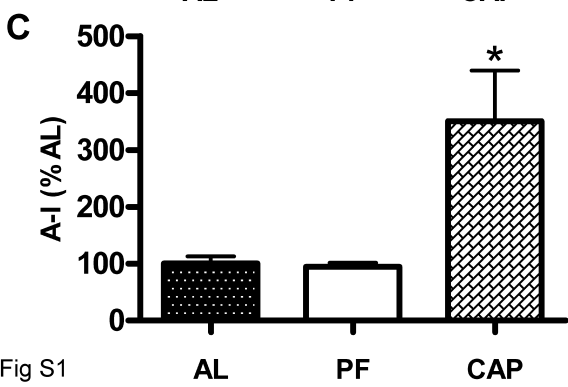

Fig S1

Supplement: en.2009-0065_1.pdf [file en.2009-0065_1.pdf]

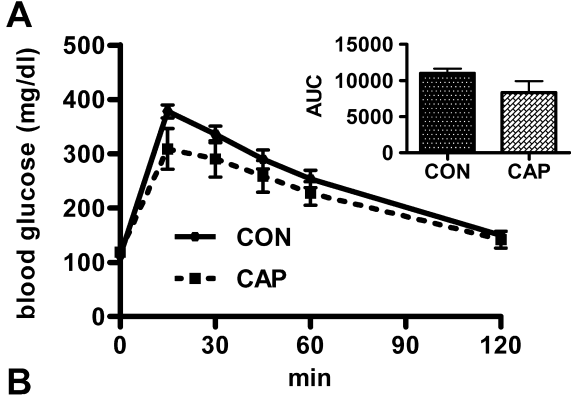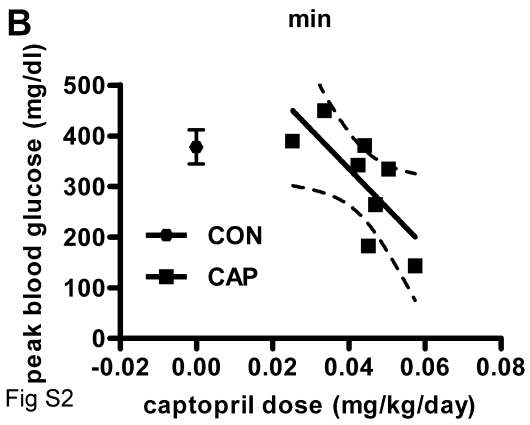

Fig S2

Supplement: en.2009-0065_2.pdf [file en.2009-0065_2.pdf]

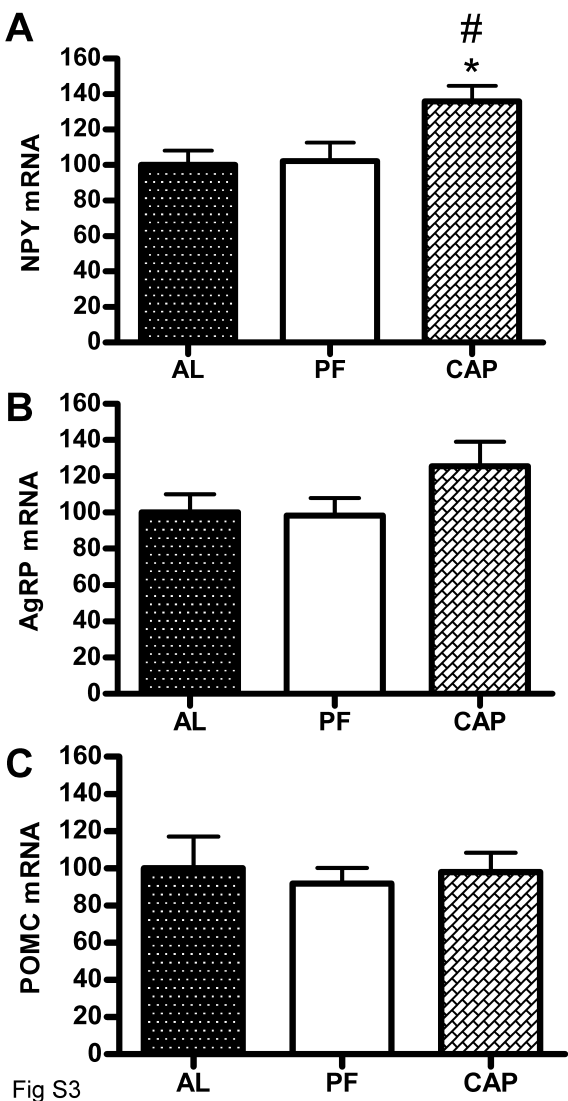

Fig S3

Supplement: en.2009-0065_3.pdf [file en.2009-0065_3.pdf]
